# Supplementary material for: Methyl jasmonate leads to necrosis and apoptosis in hepatocellular carcinoma cells via inhibition of glycolysis and represses tumor growth in mice
Source: PubMed Central journal article supplement (PMC5542241; doi:10.18632/oncotarget.17469), 2017-04-27
Supplement: oncotarget-08-45965-s001.pdf [file oncotarget-08-45965-s001.pdf]

# Methyl jasmonate leads to necrosis and apoptosis in hepatocellular carcinoma cells via inhibition of glycolysis and represses tumor growth in mice

## SUPPLEMENTARY MATERIALS

### SUPPLEMENTARY FIGURE

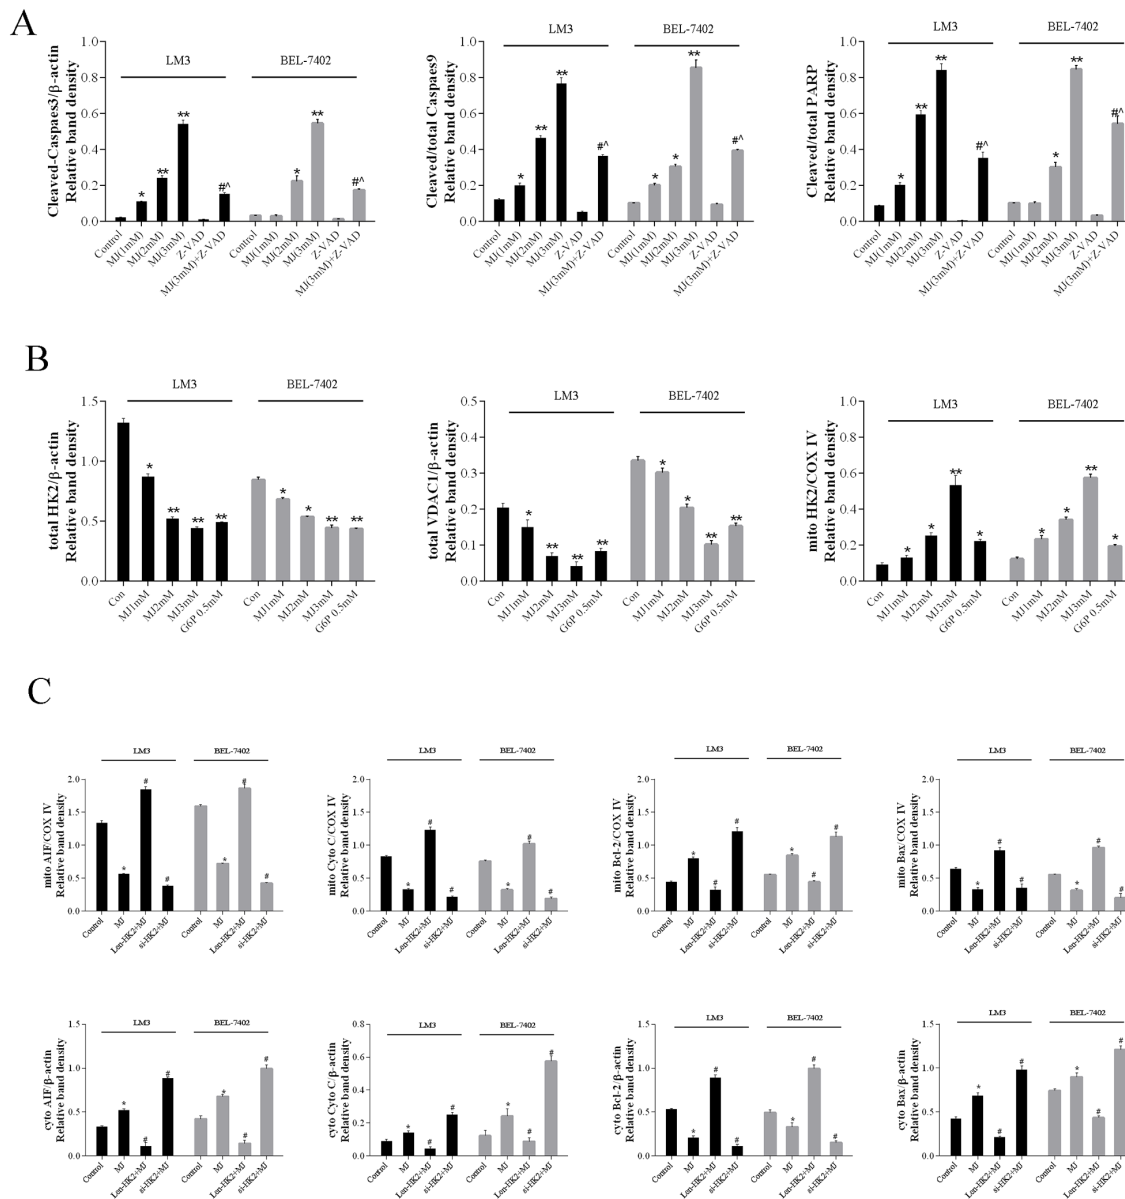

**Supplementary Figure 1: The relative band density of western blot images.** (A) The relative band density of cleaved caspase-3, caspase-9 and PARP. The data are expressed as the mean±SD [ $P < 0.05$  and  $P < 0.01$  for MJ versus Control,  $^{\#}P < 0.05$  for MJ (3 mM)+Z-VAD versus Z-VAD, and  $^{\wedge}P < 0.05$  for MJ (3 mM)+Z-VAD versus MJ (3 mM)]. (B) The relative band density of HK2 and VDAC1. [ $P < 0.05$  and  $P < 0.01$  for MJ and G6P versus Con]. (C) The relative band density of related apoptotic proteins. [ $P < 0.05$  for MJ versus Control,  $^{\#}P < 0.05$  for Len(si)-HK2+MJ versus MJ].
